# Supplementary material for: Evaluation of Groundwater Quality and Contamination Using Groundwater Pollution Index (GPI), Nitrate Pollution Index (NPI) and GIS
Source: Research Square preprint supplement (doi:10.21203/rs.3.rs-3272103/v1), 2023-08-29
Supplement: Supplementary file 1 [file 81be0ce57a61adfc38c8da6c.docx]

Annex

: Table 1 : Results of samples taken from different sites

| N° Well | **N** | **Y** | **X** | PH | EC | TDS | Ca2+ | Mg 2+ | Na+ | K+ | HCO**3-** | NO**3-** | NH**4+** | CL- | SO**4--** | Ca/Mg | RSC | RSBC | KR | MH | CL- Hazard | SAR | Na% | PI | TH | Ca+Mg | HCO3+SO4 | PIG | PNI |
| --- | --- | --- | --- | --- | --- | --- | --- | --- | --- | --- | --- | --- | --- | --- | --- | --- | --- | --- | --- | --- | --- | --- | --- | --- | --- | --- | --- | --- | --- |
| 1 | W1 | 34.39025 | -6.10155 | 7.50 | 9890.00 | 6329.6 | 14.50 | 14.00 | 71.59 | 0.24 | 9.70 | 2.75 | 0.13 | 74.82 | 9.52 | 1.04 | -18.80 | -4.80 | 2.51 | 49.12 | 74.82 | 18.96 | 71.53 | 74.64 | 1425.00 | 28.50 | 19.22 | 6.01499316 | 7.525 |
| 2 | W2 | 34.27626 | -5.89074 | 7.31 | 4910.00 | 3142.4 | 10.12 | 5.00 | 33.49 | 0.16 | 9.70 | 2.46 | 0.08 | 33.70 | 4.63 | 2.02 | -5.42 | -0.42 | 2.21 | 33.07 | 33.70 | 12.18 | 68.90 | 75.30 | 756.00 | 15.12 | 14.33 | 3.10573108 | 6.625 |
| 3 | W3 | 34.36075 | -6.13279 | 7.01 | 3720.00 | 2380.8 | 6.50 | 5.46 | 27.71 | 0.11 | 5.68 | 1.98 | 0.16 | 29.72 | 2.93 | 1.19 | -6.28 | -0.82 | 2.32 | 45.65 | 29.72 | 11.33 | 69.85 | 75.86 | 598.00 | 11.96 | 8.61 | 2.76065633 | 5.14 |
| 4 | W4 | 34.34504 | -6.02339 | 7.19 | 2050.00 | 1312 | 4.28 | 2.22 | 13.86 | 0.10 | 2.38 | 0.67 | 0.15 | 16.56 | 1.51 | 1.93 | -4.12 | -1.90 | 2.13 | 34.15 | 16.56 | 7.68 | 68.07 | 75.65 | 325.00 | 6.50 | 3.89 | 1.35111235 | 1.075 |
| 5 | W5 | 34.26064 | -5.96348 | 6.74 | 4750.00 | 3040 | 8.24 | 6.00 | 33.49 | 0.18 | 7.98 | 0.84 | 0.08 | 34.10 | 4.01 | 1.37 | -6.26 | -0.26 | 2.35 | 42.13 | 34.10 | 12.55 | 70.17 | 76.08 | 712.00 | 14.24 | 11.99 | 2.87687222 | 1.605 |
| 6 | W6 | 34.25281 | -5.89594 | 7.06 | 7130.00 | 4563.2 | 11.96 | 5.14 | 55.43 | 0.28 | 5.84 | 0.38 | 0.11 | 58.88 | 7.08 | 2.33 | -11.26 | -6.12 | 3.24 | 30.06 | 58.88 | 18.95 | 76.42 | 79.76 | 855.00 | 17.10 | 12.92 | 3.32626245 | 0.185 |
| 7 | W7 | 34.35221 | -6.0792 | 7.09 | 4520.00 | 2892.8 | 8.46 | 6.44 | 30.02 | 0.21 | 7.94 | 2.37 | 0.12 | 32.38 | 5.19 | 1.31 | -6.96 | -0.52 | 2.01 | 43.22 | 32.38 | 10.99 | 66.83 | 73.10 | 745.00 | 14.90 | 13.13 | 3.0757542 | 6.345 |
| 8 | W8 | 34.219361 | -5.9494 | 7.15 | 1590.00 | 1017.6 | 2.88 | 3.36 | 9.24 | 0.10 | 3.42 | 0.30 | 0.08 | 10.10 | 2.36 | 0.86 | -2.82 | 0.54 | 1.48 | 53.85 | 10.10 | 5.23 | 59.69 | 71.64 | 312.00 | 6.24 | 5.78 | 1.34428155 | -0.07 |
| 9 | W9 | 34.31114 | -5.94493 | 7.85 | 1880.00 | 1203.2 | 2.84 | 3.44 | 12.70 | 0.10 | 6.86 | 0.30 | 0.08 | 10.48 | 1.18 | 0.83 | 0.58 | 4.02 | 2.02 | 54.78 | 10.48 | 7.16 | 66.91 | 80.71 | 314.00 | 6.28 | 8.04 | 1.49199569 | -0.07 |
| 10 | W10 | 34.29463 | -5.91944 | 7.04 | 2900.00 | 1856 | 8.04 | 6.20 | 13.86 | 0.07 | 8.00 | 0.46 | 0.05 | 10.04 | 11.80 | 1.30 | -6.24 | -0.04 | 0.97 | 43.54 | 10.04 | 5.19 | 49.32 | 59.39 | 712.00 | 14.24 | 19.80 | 1.93832211 | 0.425 |
| 11 | W11 | 34.22907 | -5.96899 | 7.31 | 1700.00 | 1088 | 4.30 | 5.06 | 8.08 | 0.06 | 6.56 | 0.38 | 0.11 | 7.46 | 4.25 | 0.85 | -2.80 | 2.26 | 0.86 | 54.06 | 7.46 | 3.73 | 46.33 | 61.02 | 468.00 | 9.36 | 10.81 | 1.55745645 | 0.178 |
| 12 | W12 | 34.2265 | -5.90012 | 7.63 | 1540.00 | 985.6 | 4.06 | 3.04 | 9.24 | 0.08 | 5.10 | 1.07 | 0.12 | 8.50 | 2.36 | 1.34 | -2.00 | 1.04 | 1.30 | 42.82 | 8.50 | 4.90 | 56.55 | 70.37 | 355.00 | 7.10 | 7.46 | 1.44066517 | 2.317 |
| 13 | W13 | 34.2603 | -5.87274 | 7.14 | 3850.00 | 2464 | 9.10 | 4.14 | 25.40 | 0.10 | 8.20 | 1.56 | 0.16 | 23.78 | 7.08 | 2.20 | -5.04 | -0.90 | 1.92 | 31.27 | 23.78 | 9.87 | 65.73 | 73.15 | 662.00 | 13.24 | 15.28 | 2.27345455 | 3.836 |
| 14 | W14 | 34.43225 | -5.86968 | 7.71 | 5110.00 | 3270.4 | 10.24 | 5.46 | 36.95 | 0.15 | 6.04 | 0.50 | 0.14 | 37.12 | 8.97 | 1.88 | -9.66 | -4.20 | 2.35 | 34.78 | 37.12 | 13.18 | 70.18 | 74.85 | 785.00 | 15.70 | 15.01 | 2.68650168 | 0.55 |
| 15 | W15 | 34.39449 | -5.76477 | 7.36 | 4900.00 | 3136 | 9.76 | 5.92 | 33.49 | 0.13 | 9.12 | 2.28 | 0.09 | 28.98 | 10.86 | 1.65 | -6.56 | -0.64 | 2.14 | 37.76 | 28.98 | 11.96 | 68.11 | 74.25 | 784.00 | 15.68 | 19.98 | 2.99788881 | 6.0815 |
| 16 | W16 | 34.3611 | -5.80004 | 7.47 | 2410.00 | 1542.4 | 6.50 | 3.28 | 15.01 | 0.13 | 7.84 | 0.46 | 0.39 | 14.64 | 2.83 | 1.98 | -1.94 | 1.34 | 1.53 | 33.54 | 14.64 | 5.72 | 60.55 | 71.84 | 489.00 | 9.78 | 10.67 | 1.54471279 | 0.426 |
| 17 | W17 | 34.32347 | -5.88871 | 7.38 | 4900.00 | 3136 | 9.96 | 5.22 | 33.49 | 0.15 | 10.72 | 6.24 | 0.11 | 27.80 | 10.38 | 1.91 | -4.46 | 0.76 | 2.21 | 34.39 | 27.80 | 12.15 | 68.81 | 75.54 | 759.00 | 15.18 | 21.10 | 3.72990256 | 18.344 |
| 18 | W18 | 34.2158 | -5.88721 | 7.60 | 9020.00 | 5772.8 | 12.50 | 9.94 | 66.97 | 0.30 | 13.10 | 4.08 | 0.05 | 58.44 | 11.52 | 1.26 | -9.34 | 0.60 | 2.98 | 44.30 | 58.44 | 19.99 | 74.90 | 78.95 | 1122.00 | 22.44 | 24.62 | 5.30640506 | 11.648 |
| 19 | W19 | 34.46007 | -6.15099 | 7.17 | 17550.00 | 11232 | 14.46 | 16.02 | 85.19 | 0.25 | 11.10 | 0.23 | 0.06 | 82.50 | 19.26 | 0.90 | -19.38 | -3.36 | 2.79 | 52.56 | 82.50 | 21.82 | 73.65 | 76.53 | 1524.00 | 30.48 | 30.36 | 6.26690747 | -0.287 |
| 20 | W20 | 34.47037 | -6.18921 | 7.62 | 3980.00 | 2547.2 | 8.76 | 3.12 | 26.56 | 0.15 | 6.08 | 2.77 | 0.09 | 26.12 | 7.55 | 2.81 | -5.80 | -2.68 | 2.24 | 26.26 | 26.12 | 10.89 | 69.09 | 75.51 | 594.00 | 11.88 | 13.63 | 2.38526504 | 7.587 |
